# Supplementary material
Source: PubMed Central journal article supplement (PMC4327387)
Supplement: supp_128.4.728_JCS160051.pdf [file supp_128.4.728_JCS160051.pdf]

**Table S1. Downregulated genes.**

[Download Table S1](#)

**Table S2.**

[Download Table S2](#)
